# Supplementary material
Source: ML conference proceedings conference paper supplement (https://proceedings.neurips.cc/paper_files/paper/2021/hash/9a3f54913bf27e648d1759c18d007165-Abstract.html)
Supplement: Supplementary file 1 [file 9a3f54913bf27e648d1759c18d007165-Supplemental.zip]

Archive with 2 entries (2 files):
- code_neurips2021_thresholding_bandits.ipynb
- neurips_2021.pdf
