# Supplementary material
Source: ML conference proceedings conference paper supplement (https://proceedings.neurips.cc/paper_files/paper/2021/hash/9a3f54913bf27e648d1759c18d007165-Abstract.html)
Supplement: Supplementary file 1 [file 9a3f54913bf27e648d1759c18d007165-Supplemental.zip › code_neurips2021_thresholding_bandits.ipynb]

# %% [code]
import numpy as np
import matplotlib.pyplot as plt
plt.rcParams.update(plt.rcParamsDefault)
from scipy.stats import norm
from scipy.stats import mstats
from scipy.special import lambertw
from scipy.optimize import fsolve
from time import time
from math import e
import progressbar
from scipy.optimize import minimize 
import warnings
warnings.filterwarnings("ignore")

# %% [markdown]
### Error estimates and optimal allocation

# %% [code]
# count errors made by the threshold decision rule on a vector of means.
def count_errors(means, threshold, classes):
    return np.sum((means>threshold) != classes)

def optimal_allocation_exp(mu, s2, t):
    K = len(mu)
    idx = np.argsort(np.abs(mu))
    mu_sort = mu[idx]
    KLs = 0.5 * mu_sort**2/s2
    Hs = np.cumsum(1/KLs[::-1])[::-1] 
    Hlogs = np.cumsum(np.log(KLs[::-1])/KLs[::-1])[::-1] 
    log_gammas = -(t-Hlogs)/Hs
    gammas = np.exp(log_gammas)
    err_values = range(K) + Hs * gammas
    for i in range(K):
        if KLs[i] < gammas[i]:
            err_values[i] = np.inf
        if i>0:
            if KLs[i-1] > gammas[i]:
                err_values[i] = np.inf
    kopt = np.argmin(err_values)
    N = np.zeros(K)
    N[idx[kopt:K]] = (np.log(KLs[kopt:K]) - log_gammas[kopt]) / KLs[kopt:K]
    return N

# %% [markdown]
### Sampling rules

Tracking methods compute the optimal allocation at some point and pull to approach it. These functions are named sample_tracking_XYZ, where X, Y and Z indicate variants and take values among the following:
- X: the sub-gaussian error estimate ("exp") is used (instead of the gaussian one)
- O: the allocation is computed at an optimistic point (instead of the empirical means)
- W: the pulling decision uses a weighted argmin. 

# %% [code]
# optimistic Frank-Wolfe, sub-gaussian version (based on the "exp" error estimate)

def sample_FWT(empirical_means, N, s2, mu, T):
    #X = np.maximum(1, 0.5 * N * empirical_means**2 / s2)
    X = (1 + np.sqrt(0.5 * N * empirical_means**2 / s2))**2
    return np.argmin(X - np.log(X) + np.log(N))


# oracle optimal allocation tracking
def sample_tracking_knowing_mu(empirical_means, N, s2, mu, T):
    X = np.abs(mu)
    t = sum(N)+1
    opt_alloc = optimal_allocation_exp(X, s2, t)
    return np.argmin(N - opt_alloc)

# --------------------------- Baselines --------------------------------
# uniform sampling
def sample_uniform(empirical_means, N, s2, mu, T):
    return int(np.sum(N)%len(N))

# LSA 
def sample_lsa(empirical_means, N, s2, mu, T):
    return np.argmin(N * 0.5 * empirical_means**2/s2 + np.log(N))

# APT
def sample_apt(empirical_means, N, s2, mu, T):
    return np.argmin(N * empirical_means**2)

# %% [markdown]
### Threshold computations

# %% [code]
def threshold_zero(means, N, s2):
    return 0

def threshold_mean_of_means(means, N, s2):
    return np.mean(means)

def threshold_median_of_means(means, N, s2):
    return np.median(means)

def threshold_minimizer(means, N, s2):
    t = sum(N)
    def func(theta):
        return np.sum(np.exp(- (N/t)*(theta - means * np.sqrt(t/s2))**2 / 2) * np.tanh(means) * np.sqrt(N))
    return fsolve(func, np.median(means)) * np.sqrt(s2/t)

# %% [markdown]
### The function used to run experiments

# %% [code]
def runit_given_mu(sampling_rule, nb_exp, T, mu, sigma, seed=0):
    np.random.seed(seed)
    s2 = sigma**2
    K = len(mu)
    empirical_means = np.zeros((nb_exp, T, K))
    N = np.zeros((nb_exp, T, K))
    for i in range(nb_exp):
        n = np.zeros(K)
        emp_means = np.zeros(K)
        for t in range(T):
            if t<K:
                k = t
            else:
                # query sampling rule for next arm to sample
                k = sampling_rule(emp_means, n, s2, mu, T)
            # update pull counts and empirical means
            n[k] += 1
            X = np.random.normal(loc=mu[k], scale=sigma)
            emp_means[k] += (X-emp_means[k])/n[k]
            # store n and emp_means for that experiment and time
            N[i,t,:] = n[:]
            empirical_means[i,t,:] = emp_means[:]
    return empirical_means, N

# %% [markdown]
# Experiments

# %% [markdown]
### Improvement over non adaptive methods

The goal of this experiment is to show the improvement of adaptive algorithms over optimal non-adaptive sampling. We consider fixed $\mu_i \in \{-1,1\}$. The optimal non-adaptive allocation rule is the uniform one. 

# %% [code]
nu = np.array([-1, 1]) # means of the two classes. 
K = 100  # number of points
T = 800  # total number of samples to be allocated to the points
sigma = 1  # standard deviation of a sample given the mean of the point
s2 = sigma**1
classes = np.tile(np.array([0,1]), int(K/2))  # K/2 first points are negative

# %% [code]
nb_exp = 500
seed = 10
mu = nu[classes] * np.ones(K) # all the mus are either 1 or -1

# %% [code]
sampling_rules = [
    (sample_uniform, "Oracle"),
    (sample_FWT, "FWT"),
    (sample_lsa, "LSA"),
    (sample_apt, "APT"),
]
nb_sr = len(sampling_rules)

empirical_means = np.zeros((nb_sr, nb_exp, T, K))
N = np.zeros((nb_sr, nb_exp, T, K))
errors = np.zeros((nb_sr, nb_exp, T))
opt_errors = np.zeros(nb_exp)
opt_errors_median = np.zeros(nb_exp)
for j,sr_tuple in enumerate(sampling_rules):
    sr = sr_tuple[0]
    t_start = time()
    empirical_means[j,:,:,:], N[j,:,:,:] = runit_given_mu(sr, nb_exp, T, mu, sigma, seed)
    t_end = time()
    print("sampling rule ", sr_tuple[1], ", ", np.round(t_end-t_start,2), "s")
    for i in range(nb_exp):
        for t in range(T):
            errors[j,i,t] = count_errors(empirical_means[j,i,t,:], 0, (mu[:]>0))

# %% [code]
mean_error = np.round(np.mean(errors, 1),2)

# %% [code]
colors = plt.rcParams["axes.prop_cycle"].by_key()["color"]
fig=plt.figure(figsize=(4,3), dpi= 100, facecolor='w', edgecolor='k')  # to have big plots
T_plot = 400
for i in range(len(sampling_rules)):
    means = np.mean(errors[i,:,:]/errors[0,:,:], axis=0)
    quantiles = mstats.mquantiles(errors[i,:,:]/errors[0,:,:], axis=0)
    plt.plot(np.arange(T_plot-1),quantiles[1,1:T_plot], label=sampling_rules[i][1], color = colors[i+1], linewidth=2)
    plt.fill_between(np.arange(T_plot-1), quantiles[0,1:T_plot] ,quantiles[2,1:T_plot], color= colors[i+1], alpha=.2)
plt.xlabel("Time")
plt.ylabel('Ratio of errors')
plt.legend()
plt.savefig('improvement_over_uniform.pdf', bbox_inches = "tight")
plt.show()

# %% [markdown]
## About the upper-bounds

# %% [code]
K = 50  # number of arms
T = 4.5e8 # total number of samples to be allocated to the points
n = 100 # number of points to be computed for the plots
sigma = 1  # standard deviation of a sample given the mean of the point
s2 = sigma**2
classes = np.repeat(np.array([0,1]), K/2)  # K/2 first points are negative
bar = progressbar.ProgressBar(maxval=T, \
    widgets=[progressbar.Bar('=', '[', ']'), ' ', progressbar.Percentage()])

# %% [code]
p = 2
mu = np.linspace(1, 1/K, K)**p

# %% [code]
times = np.concatenate((np.arange(int(n/2)) + 1, (np.arange(int(n/2))+1) * T/(n/2-1)))

# %% [code]
# Upper-bounds of APT
apt_bound = 2 * K * np.sqrt(e * times) * np.exp(- times / (4 * np.sum(1/mu**2)))

# %% [code]
# The asymptotic bound of Corollary 1
fwt_asympt_bound = 2 * np.sum(np.minimum(np.outer(np.exp(-(np.sum(1/mu**2)*np.log(mu**2) + np.sum(1/mu**2 * np.log(1/mu**2)))/(2 * np.sum(1/mu**2))),
                                       np.sqrt(e * times) * np.exp(-times / (4 * np.sum(1/mu**2)))),1), 
                   axis = 0)
times2 = 2 * np.sum(1/mu**2) * (2  - np.log(times / e)) + 2 * np.sum(1/mu**2 * np.log((mu**2 * np.max(mu**2))/np.min(mu**4)) )
fwt_asympt_bound[np.where(times < times2)] = K

# %% [code]
# The non-adaptive oracle bound
oracle_bound = np.zeros(n)
bound = K
mu_sort = np.sort(np.abs(mu))
mcurrent = K-1

bar.start()
for i in range(n):
    oracle_bound[i] = bound
    bar.update(i+1)
    t = times[i]

    for k in range(mcurrent+1): 
        m = mcurrent - k 
        delta2_S = mu_sort[m:K]**2
        tau = (t + np.sum(1/delta2_S * np.log(1/delta2_S)))/np.sum(1/delta2_S)
        if (tau + np.log(mu_sort[m]**2) >=1) and  ((m == 0) or (tau + np.log(mu_sort[m-1]**2) < 1)):
            bound = m + np.sum(1/delta2_S)  * np.exp(-tau)
            if (bound < oracle_bound[i]):
                oracle_bound[i] = bound
                mcurrent = m

bar.finish()

# %% [code]
# LSA bound
lsa_bound = K * np.ones(n)
ms = (K-1) * np.ones(n)
js = (K-1) * np.ones(n)
mu_sort = np.sort(np.abs(mu))
jcurrent = K-1
mcurrent = K-1

Cold = 1
Cs = np.ones(n)

bar = progressbar.ProgressBar(maxval=T*K, \
    widgets=[progressbar.Bar('=', '[', ']'), ' ', progressbar.Percentage()])
bar.start()
it = 0
for i in range(n):
    t = times[i]
    if (i > 0):
        jcurrent = int(js[i-1])
        mcurrent = int(ms[i-1])
        Cold = Cs[i-1]
        
    # S' corresponds to the set j,...,K-1
    # S corresponds to the set m,...,K with m <= j
    for k in range(min(jcurrent+1, K-1)): 
        it += 1
        bar.update(it+1)
        j = jcurrent - k
        m0 = min(mcurrent,j)
        for l in range(m0+1):
            m = m0 - l
            delta2_S1 = mu_sort[j:K]**2
            delta2_SC = mu_sort[m:K]**2
            delta2_SCinv = np.sum(1/delta2_SC) 
            delta2_S1inv = np.sum(1/delta2_S1) 
            
            tau = (t/2 + np.sum(1/delta2_SC * np.log(1/delta2_SC))) / delta2_SCinv
            
            def f(C):
                t0 = min(m * np.exp(C),t)
                return j + e * (K-j) * np.exp(-tau + t0/(2*delta2_SCinv) + C) + t * np.sum(np.exp(-np.real(lambertw(np.exp(C) * delta2_S1))))
            

            Cmin = 1 + np.log(1/mu_sort[m]**2)
            Cminimize = minimize(f, Cold, bounds=((Cmin,None),)).x[0]
            
            bound = f(Cminimize)
        
            if (bound < lsa_bound[i]):
                lsa_bound[i] = bound
                ms[i] = m
                js[i] = j
                Cs[i] = Cminimize
                
bar.finish()

# %% [code]
fig=plt.figure(figsize=(4,3), dpi= 100, facecolor='w', edgecolor='k')  # to have big plots
# To specify the number of ticks on both or any single axes
plt.plot(times, np.minimum(apt_bound, K), label = "APT")
plt.plot(times, np.minimum(lsa_bound, K), label = "LSA")
plt.plot(times,np.minimum(oracle_bound,K), label = "Oracle")
plt.plot(times, np.minimum(fwt_asympt_bound, K), label = "FWT (asymp)")
plt.locator_params(axis='x', nbins=6)
plt.xlabel("Time")
plt.ylabel('Upper-bound')
plt.legend()
plt.show()

# %% [code]
# FWT bound
fwt_bound = K * np.ones(n)
ms = (K-1) * np.ones(n)
js = (K-1) * np.ones(n)
mu_sort = np.sort(np.abs(mu))
jcurrent = K-1
mcurrent = K-1

Cold = 1
Cs = np.ones(n)

bar = progressbar.ProgressBar(maxval=T*K, \
    widgets=[progressbar.Bar('=', '[', ']'), ' ', progressbar.Percentage()])
bar.start()
it = 0
for i in range(n):
    t = times[i]
    if (i > 0):
        jcurrent = int(js[i-1])
        mcurrent = int(ms[i-1])
        Cold = Cs[i-1]
        
    # S' corresponds to the set j,...,K-1
    # S corresponds to the set m,...,K with m <= j
    for k in range(min(jcurrent+1, K-1)): 
        it += 1
        bar.update(it+1)
        j = jcurrent - k
        m0 = min(mcurrent,j)
        for l in range(m0+1):
            m = m0 - l
            delta2_S1 = mu_sort[j:K]**2
            delta2_SC = mu_sort[m:K]**2
            delta2_SCinv = np.sum(1/delta2_SC) 
            delta2_S1inv = np.sum(1/delta2_S1) 
            
            tau = (t/2 + np.sum(1/delta2_SC * np.log(1/delta2_SC))) / delta2_SCinv
            
            def f(C):
                t0 = min(m * np.exp(C-1),t)
                return j + e * (K-j) * np.exp(-tau + t0/(2*delta2_SCinv) + C) + t * delta2_S1inv * np.exp(-C) 

            Cmin = 1 + np.log(1/mu_sort[m]**2)
            if (m > 0):
                Cminimize = minimize(f, Cold).x[0]
            else:
                Cminimize = tau / 2 + np.log(t * delta2_S1inv / (e * (K-j))) / 2
            
            bound = f(max(Cminimize, Cmin))
        
            if (bound < fwt_bound[i]):
                fwt_bound[i] = bound
                ms[i] = m
                js[i] = j
                Cs[i] = Cminimize
                
bar.finish()

# %% [code]
fig=plt.figure(figsize=(4,3), dpi= 100, facecolor='w', edgecolor='k')  # to have big plots
plt.plot(times, K - ms , label = "Size of S")
plt.plot(times, K - js, label = "Size of S'")
plt.locator_params(axis='x', nbins=6)
plt.xlabel("Time")
plt.ylabel('Number of arms')
plt.legend()
plt.savefig('evolution_of_S.pdf', bbox_inches = "tight")
plt.show()

# %% [code]
fig=plt.figure(figsize=(4,3), dpi= 100, facecolor='w', edgecolor='k')  # to have big plots
plt.locator_params(axis='x', nbins=6)
plt.plot(times,oracle_bound, label = "Oracle")
plt.plot(times,np.minimum(fwt_bound, K), label = "FWT")
plt.plot(times,np.minimum(lsa_bound, K), label = "LSA")
plt.plot(times,np.minimum(apt_bound, K), label = "APT")
plt.xlabel("Time")
plt.ylabel('Upper-bound')
plt.legend()
plt.savefig('upper_bounds_comparison.pdf', bbox_inches = "tight")
plt.show()

# %% [markdown]
## Experiments with the algorithms

# %% [code]
K = 50  # number of arms (should be even)
T = 3000  # total number of samples to be allocated to the points
n = 100
times = (np.arange(n)+1) * T/n
sigma = 1  # standard deviation of a sample given the mean of the point
s2 = sigma**2
classes = np.tile(np.array([0,1]), int(K/2))  # half of the points are negative

# %% [code]
p = 1
mu = (2 * classes -1) * np.linspace(1, 1/K, K)**p
mu = np.sort(mu)

# %% [code]
nb_exp = 500
seed = 1989
sampling_rules = [
    (sample_uniform, "Uniform"),
    (sample_tracking_knowing_mu, "Oracle"),
    (sample_FWT, "FWT"),
    (sample_lsa, "LSA"),
    (sample_apt, "APT"),
]
nb_sr = len(sampling_rules)

empirical_means = np.zeros((nb_sr, nb_exp, T, K))
N = np.zeros((nb_sr, nb_exp, T, K))
errors = np.zeros((nb_sr, nb_exp, T))
opt_errors = np.zeros(nb_exp)
opt_errors_median = np.zeros(nb_exp)
for j,sr_tuple in enumerate(sampling_rules):
    sr = sr_tuple[0]
    t_start = time()
    empirical_means[j,:,:,:], N[j,:,:,:] = runit_given_mu(sr, nb_exp, T, mu, sigma, seed)
    t_end = time()
    print("sampling rule ", sr_tuple[1], ", ", np.round(t_end-t_start,2), "s")
    for i in range(nb_exp):
        for t in range(T):
            errors[j,i,t] = count_errors(empirical_means[j,i,t,:], 0, (mu[:]>0))

# %% [code]
mean_error = np.round(np.mean(errors, 1),2)

fig=plt.figure(figsize=(4,3), dpi= 100, facecolor='w', edgecolor='k')  # to have big plots
Tplot = 1000
for i in range(len(sampling_rules)):
    plt.plot((mean_error[i,:]), label=sampling_rules[i][1])
    
plt.xlabel("Time")
plt.ylabel('Number of errors')
plt.xlim(0, Tplot)
plt.ylim(0, K/2)
plt.legend()
plt.savefig('performance_comparison.pdf', bbox_inches = "tight")
plt.show()

# %% [code]
fig=plt.figure(figsize=(4,3), dpi= 100, facecolor='w', edgecolor='k')  # to have big plots
T_plot = T
for i in range(len(sampling_rules)):
    plt.plot(np.divide(mean_error[i,1:T_plot],mean_error[1,1:T_plot]), label=sampling_rules[i][1])
plt.xlabel("Time")
plt.ylabel('Ratio of mean errors')
plt.legend()
plt.savefig('improvement_over_oracle.pdf', bbox_inches = "tight")
plt.show()

# %% [code]
fig=plt.figure(figsize=(12,3), dpi= 100, facecolor='w', edgecolor='k')  
plt.subplot(1,3,1)
plt.title("T=500")
plt.plot(mu,np.transpose(np.mean(N[:,:,500-1,:],axis=1))*K/500)
plt.xlabel("mu")
plt.subplot(1,3,2)
plt.title("T=3000")
plt.plot(mu,np.transpose(np.mean(N[:,:,3000-1,:],axis=1))*K/3000)
plt.xlabel("mu")
plt.subplot(1,3,3)
plt.title("T=10000")
for i in range(len(sampling_rules)):
    plt.plot(mu,np.mean(N[i,:,10000-1,:], axis = 0)*K/10000, label=sampling_rules[i][1])
plt.xlabel("mu")
plt.legend()
plt.savefig('sampling_distribution.pdf', bbox_inches = "tight")
plt.show()

# %% [code]
